# Supplementary material for: Molecular Epidemiology of Methicillin-Resistant Staphylococcus aureus in Horses, Cats, and Dogs Over a 5-Year Period in France
Source: PubMed Central journal article supplement (PMC5733339; doi:10.3389/fmicb.2017.02493), 2017-12-13
Supplement: Table_2.pdf [file Table_2.pdf]

Table S2. Molecular and epidemiological characteristics of the 130 MRSA isolates

| Isolate            | Year | Animal host | Pathology                   | District | Clone                               | IEC <sup>d</sup> | Resistance genes                                   | Enterotoxins genes | Spa-type |
|--------------------|------|-------------|-----------------------------|----------|-------------------------------------|------------------|----------------------------------------------------|--------------------|----------|
| 26023              | 2010 | Horse       | Reproductive tract          | 33       | CC398-IV                            | no               | <i>aacA-aphD, tet(M)</i>                           | none               | t011     |
| 31749 <sup>a</sup> | 2011 | Horse       | Reproductive tract          | 61       | CC8-IV, EMRSA-14                    | no               | <i>aacA-aphD, tet(M), dfrS1, fosB</i>              | none               | t064     |
| 32084              | 2011 | Horse       | Reproductive tract          | 50       | CC8-IV, USA500                      | no               | <i>erm(C), aacA-aphD, tet(M), dfrS1, fosB</i>      | <i>seb/sek/seq</i> | t1952    |
| 32085              | 2011 | Horse       | Reproductive tract          | 50       | CC8-IV, EMRSA-14                    | no               | <i>erm(C), tet(M), dfrS1, fosB</i>                 | none               | t1952    |
| 32090              | 2011 | Horse       | Reproductive tract          | 50       | CC398-IV                            | no               | <i>aacA-aphD, tet(M)</i>                           | none               | t011     |
| 32141              | 2012 | Horse       | SSTI <sup>b</sup>           | 14       | CC398-IV                            | no               | <i>aacA-aphD, tet(M)</i>                           | none               | t011     |
| 32145              | 2012 | Horse       | SSTI                        | 78       | CC398-IV                            | no               | <i>aacA-aphD, tet(M)</i>                           | <i>sek/seq</i>     | t011     |
| 32147              | 2012 | Horse       | Reproductive tract          | 74       | CC398-IV                            | no               | <i>aacA-aphD, tet(M)</i>                           | none               | t779     |
| 32150              | 2012 | Horse       | SSTI                        | 76       | CC398-IV                            | no               | <i>aacA-aphD, tet(M)</i>                           | none               | t011     |
| 32151              | 2012 | Horse       | Reproductive tract          | 50       | CC398-IV                            | no               | <i>aacA-aphD, tet(M), cat</i>                      | none               | t011     |
| 32166              | 2012 | Horse       | Reproductive tract          | 50       | CC398-IV                            | no               | <i>aacA-aphD, tet(M)</i>                           | none               | t779     |
| 32167              | 2012 | Horse       | SSTI                        | 34       | CC398-IV                            | type B           | <i>vga(A), tet(M)</i>                              | none               | t899     |
| 32347              | 2012 | Horse       | Reproductive tract          | 33       | CC398-IV                            | no               | <i>aacA-aphD, tet(M), cat</i>                      | none               | t011     |
| 32716              | 2012 | Horse       | SSTI                        | 49       | CC398-IV                            | type D           | <i>erm(A), aadD, fosB</i>                          | <i>sea</i>         | t011     |
| 32718              | 2012 | Horse       | Bone infection              | 92       | CC8-IV, USA500                      | no               | <i>erm(C), aacA-aphD, tet(M), cat, dfrS1, fosB</i> | <i>seb/sek/seq</i> | t394     |
| 32719              | 2012 | Horse       | SSTI                        | 92       | CC8-IV, USA500                      | no               | <i>erm(C), aacA-aphD, tet(M), cat, dfrS1, fosB</i> | <i>seb/sek/seq</i> | t394     |
| 32720              | 2012 | Horse       | SSTI                        | 92       | CC8-IV, USA500                      | no               | <i>erm(C), aacA-aphD, tet(M), cat, dfrS1, fosB</i> | <i>seb/sek/seq</i> | t394     |
| 32721              | 2012 | Horse       | SSTI                        | 91       | CC8-IV, USA500                      | no               | <i>erm(C), aacA-aphD, tet(M), cat, dfrS1, fosB</i> | <i>seb/sek/seq</i> | t394     |
| 32722              | 2012 | Horse       | Reproductive tract          | 10       | CC398-IV                            | no               | <i>aacA-aphD, tet(M)</i>                           | none               | t011     |
| 32723              | 2012 | Horse       | Respiratory tract infection | 1        | <b>CC130-XI<sup>c</sup></b>         | no               | none                                               | none               | t6220    |
| 32777              | 2012 | Horse       | SSTI                        | 10       | CC398-IV                            | no               | <i>aacA-aphD, tet(M)</i>                           | none               | t011     |
| 32779              | 2012 | Horse       | SSTI                        | 89       | CC8-IV, USA500                      | no               | <i>erm(C), aacA-aphD, tet(M), cat, dfrS1, fosB</i> | <i>seb/sek/seq</i> | t394     |
| 32780              | 2012 | Horse       | SSTI                        | 92       | CC398-IV                            | no               | <i>aacA-aphD, tet(M)</i>                           | none               | t011     |
| 32781              | 2012 | Horse       | Respiratory tract infection | 67       | CC8-atypical SCCmec, Hannover clone | no               | <i>aacA-aphD, aph3, sat, tet(M), fosB</i>          | <i>seb/sek/seq</i> | t009     |
| 32782              | 2012 | Horse       | SSTI                        | 90       | CC398-IV                            | no               | <i>aacA-aphD, tet(M)</i>                           | none               | t011     |
| 32960              | 2012 | Horse       | Reproductive tract          | 1        | CC398-IV                            | type B           | <i>aacA-aphD, tet(M)</i>                           | none               | t011     |
| 32970              | 2013 | Horse       | SSTI                        | 92       | CC8-IV, USA500                      | no               | <i>erm(C), aacA-aphD, tet(M), cat, dfrS1, fosB</i> | <i>seb/sek/seq</i> | t394     |
| 32971              | 2012 | Horse       | SSTI                        | 44       | CC398-IV                            | no               | <i>aacA-aphD, tet(M)</i>                           | none               | t011     |

|       |      |       |                             |    |                 |        |                                                    |                    |        |
|-------|------|-------|-----------------------------|----|-----------------|--------|----------------------------------------------------|--------------------|--------|
| 32973 | 2013 | Horse | SSTI                        | 14 | CC398-IV        | no     | <i>aacA-aphD, tet(M)</i>                           | none               | t011   |
| 32975 | 2012 | Horse | SSTI                        | 78 | CC8-IV, USA500  | no     | <i>erm(C), aacA-aphD, tet(M), cat, dfrS1, fosB</i> | <i>seb/sek/seq</i> | t394   |
| 32976 | 2013 | Horse | SSTI                        | 92 | CC398-IV        | no     | <i>aacA-aphD, tet(M)</i>                           | none               | t011   |
| 32977 | 2012 | Horse | SSTI                        | 92 | CC8-IV, USA500  | no     | <i>erm(C), aacA-aphD, tet(M), cat, dfrS1, fosB</i> | <i>seb/sek/seq</i> | t394   |
| 33329 | 2013 | Horse | SSTI                        | 92 | CC8-IV, USA500  | no     | <i>erm(C), aacA-aphD, tet(M), cat, dfrS1, fosB</i> | <i>seb/sek/seq</i> | t394   |
| 33330 | 2013 | Horse | Respiratory tract infection | 78 | CC8-IV, USA500  | no     | <i>erm(C), aacA-aphD, tet(M), cat, dfrS1, fosB</i> | <i>seb/sek/seq</i> | t394   |
| 33584 | 2013 | Horse | NP                          | 12 | CC398-IV        | type B | <i>erm(B), vga(A), tet(M), dfrS1</i>               | none               | t899   |
| 33589 | 2013 | Horse | Reproductive tract          | 50 | CC398-IV        | no     | <i>aacA-aphD, tet(M)</i>                           | none               | t011   |
| 33594 | 2013 | Horse | Bone infection              | 61 | CC398-IV        | no     | <i>aacA-aphD, tet(M), cat</i>                      | none               | t011   |
| 33709 | 2013 | Horse | Reproductive tract          | 14 | CC398-IV        | no     | <i>aacA-aphD, tet(M)</i>                           | none               | t108   |
| 33710 | 2013 | Horse | Abdominal surgery           | 77 | CC398-IV        | no     | <i>aacA-aphD, tet(M)</i>                           | none               | t011   |
| 33868 | 2013 | Horse | Bone infection              | 61 | CC398-IV        | no     | <i>aacA-aphD, tet(M)</i>                           | none               | t011   |
| 33871 | 2013 | Horse | Reproductive tract          | 61 | CC398-IV        | no     | <i>aacA-aphD, tet(M)</i>                           | none               | t011   |
| 33996 | 2013 | Horse | SSTI                        | 95 | <b>CC49-XI</b>  | no     | none                                               | <i>sec/sel</i>     | t208   |
| 35412 | 2013 | Horse | SSTI                        | 76 | <b>CC130-XI</b> | no     | none                                               | none               | t1736  |
| 35846 | 2013 | Horse | NP                          | 74 | CC398-IV        | type B | <i>aacA-aphD, tet(M)</i>                           | none               | t011   |
| 35847 | 2013 | Horse | NP                          | 16 | CC398-IV        | no     | <i>aacA-aphD, tet(M), cat</i>                      | none               | t011   |
| 35851 | 2014 | Horse | SSTI                        | 92 | CC8-IV, USA500  | no     | <i>erm(C), aacA-aphD, tet(M), cat, dfrS1, fosB</i> | <i>seb/sek/seq</i> | t394   |
| 35855 | 2014 | Horse | SSTI                        | 47 | CC398-IV        | no     | <i>aacA-aphD, tet(M)</i>                           | none               | txAJ   |
| 38399 | 2014 | Horse | Reproductive tract          | 31 | CC398-IV        | no     | <i>aacA-aphD, tet(M)</i>                           | none               | t011   |
| 38400 | 2014 | Horse | Abdominal surgery           | 77 | CC398-IV        | no     | <i>aacA-aphD, tet(M)</i>                           | none               | t011   |
| 38414 | 2014 | Horse | Reproductive tract          | 61 | CC398-IV        | no     | <i>aacA-aphD, tet(M), cat</i>                      | none               | t011   |
| 38423 | 2014 | Horse | SSTI                        | 14 | CC398-IV        | no     | <i>aacA-aphD, tet(M)</i>                           | none               | t011   |
| 38425 | 2014 | Horse | Bone infection              | 61 | CC398-IV        | no     | <i>aacA-aphD, tet(M), cat</i>                      | none               | t011   |
| 38494 | 2014 | Horse | Reproductive tract          | 14 | CC398-IV        | no     | <i>aacA-aphD, tet(M)</i>                           | none               | t011   |
| 38497 | 2013 | Horse | NP                          | NP | CC398-IV        | no     | <i>aacA-aphD, tet(M)</i>                           | none               | t011   |
| 38570 | 2014 | Horse | SSTI                        | 45 | <b>CC130-XI</b> | no     | none                                               | none               | t11050 |
| 38571 | 2014 | Horse | Abdominal surgery           | 37 | CC398-IV        | no     | <i>aacA-aphD, tet(M)</i>                           | none               | t011   |
| 38713 | 2014 | Horse | SSTI                        | 77 | CC398-IV        | no     | <i>aacA-aphD, tet(M)</i>                           | none               | t011   |
| 38719 | 2014 | Horse | SSTI                        | 14 | CC398-IV        | no     | <i>aacA-aphD, tet(M), dfrS1, qacC</i>              | none               | t011   |
| 38720 | 2014 | Horse | SSTI                        | 33 | CC398-IV        | no     | <i>aacA-aphD, tet(K), tet(M)</i>                   | none               | t1451  |
| 39653 | 2015 | Horse | Reproductive tract          | 14 | CC398-IV        | no     | <i>aacA-aphD, tet(M)</i>                           | none               | t011   |
| 39655 | 2015 | Horse | SSTI                        | 77 | CC398-IV        | no     | <i>aacA-aphD, tet(M), cat</i>                      | none               | t011   |
| 39680 | 2015 | Horse | Reproductive tract          | 19 | CC398-IV        | no     | <i>aacA-aphD, tet(M)</i>                           | none               | t011   |
| 39681 | 2014 | Horse | SSTI                        | 75 | CC398-IV        | no     | <i>aacA-aphD, tet(M)</i>                           | none               | t011   |
| 40087 | 2015 | Horse | SSTI                        | 78 | CC398-IV        | no     | <i>erm(C), aacA-aphD, tet(M)</i>                   | none               | t011   |

|              |      |       |                             |    |                                    |        |                                     |                                                       |      |
|--------------|------|-------|-----------------------------|----|------------------------------------|--------|-------------------------------------|-------------------------------------------------------|------|
| 40088        | 2015 | Horse | SSTI                        | 94 | CC398-IV                           | type B | <i>aacA-aphD, tet(M)</i>            | none                                                  | t011 |
| 40089        | 2015 | Horse | Reproductive tract          | 14 | CC398-IV                           | no     | <i>aacA-aphD, tet(M)</i>            | none                                                  | t011 |
| 40090        | 2015 | Horse | Reproductive tract          | 14 | CC398-IV                           | no     | <i>aacA-aphD, tet(M)</i>            | none                                                  | t011 |
| 40096        | 2015 | Horse | Reproductive tract          | 61 | CC398-IV                           | no     | <i>aacA-aphD, tet(M)</i>            | none                                                  | t011 |
| <u>25175</u> | 2011 | Cat   | SSTI                        | 6  | CC5-IV, Paediatric clone           | no     | <i>erm(C), aadD, fosB</i>           | <i>seg/sei/sem/sen/seo/seu</i>                        | t002 |
| <u>26451</u> | 2011 | Cat   | Digestive tract infection   | 76 | CC8-IV, Lyon Clone                 | type D | <i>erm(A), aadD, fosB</i>           | <i>sea</i>                                            | t068 |
| <u>26693</u> | 2011 | Cat   | Respiratory tract infection | 94 | CC5-VI, New Paediatric Clone       | no     | <i>fosB</i>                         | <i>sed/seg/sei/sej/sem/sen/seo/ser/seu</i>            | t777 |
| <u>26695</u> | 2011 | Cat   | NP                          | 94 | CC8-IV, Lyon Clone                 | type D | <i>erm(A), aadD, fosB</i>           | <i>sea</i>                                            | t574 |
| <u>26741</u> | 2012 | Cat   | NP                          | 94 | CC8-IV, Lyon Clone                 | type D | <i>erm(A), aadD, fosB</i>           | <i>sea</i>                                            | t574 |
| <u>27101</u> | 2011 | Cat   | Respiratory tract infection | 94 | CC5-VI, New Paediatric Clone       | no     | <i>fosB</i>                         | <i>sed/seg/sei/sej/sem/sen/seo/ser/seu</i>            | t777 |
| <u>27272</u> | 2011 | Cat   | NP                          | 94 | CC398-IV                           | no     | <i>aacA-aphD, tet(M)</i>            | none                                                  | t011 |
| <u>27744</u> | 2011 | Cat   | NP                          | 94 | CC22-IV, Barnim clone              | type B | none                                | <i>seg/sei/sem/sen/seo/seu</i>                        | t032 |
| <u>31929</u> | 2011 | Cat   | Bone infection              | 54 | CC5-II                             | type A | <i>erm(A), fosB</i>                 | <i>sea/sed/seg/sei/sej/sem/sen/seo/ser/seu</i>        | t003 |
| <u>32305</u> | 2012 | Cat   | Urinary tract               | 6  | CC8-IV, Lyon Clone                 | type D | <i>aadD, fosB</i>                   | <i>sea/sed/sej/ser</i>                                | t008 |
| <u>32610</u> | 2012 | Cat   | Urinary tract               | 94 | CC8-IV, Lyon Clone                 | type D | <i>erm(A), aadD, fosB</i>           | <i>sea</i>                                            | t008 |
| 32615        | 2012 | Cat   | SSTI                        | 56 | CC398-V, Dutch LA-MRSA             | no     | <i>erm(C), tet(K), tet(M), fexA</i> | none                                                  | t034 |
| 32616        | 2012 | Cat   | Urinary tract               | 56 | CC398-V, Dutch LA-MRSA             | no     | <i>erm(C), tet(K), tet(M), fexA</i> | none                                                  | t034 |
| 32654        | 2012 | Cat   | SSTI                        | 92 | CC398-IV                           | no     | <i>aacA-aphD, tet(M)</i>            | none                                                  | t011 |
| <u>32664</u> | 2012 | Cat   | SSTI                        | 94 | CC8-IV, Lyon Clone                 | no     | <i>erm(A), aadD, fosB</i>           | <i>sea</i>                                            | t008 |
| 32665        | 2012 | Cat   | Urinary tract               | 56 | CC398-V, Dutch LA-MRSA             | no     | <i>tet(M), fexA</i>                 | none                                                  | t034 |
| 32691        | 2011 | Cat   | SSTI                        | 77 | CC398-IV                           | type D | <i>aacA-aphD, tet(M)</i>            | none                                                  | t011 |
| <u>32698</u> | 2011 | Cat   | NP                          | 92 | CC8-IV, Lyon Clone variant sea-neg | no     | <i>aadD</i>                         | <i>sed/sej/ser</i>                                    | t622 |
| <u>32775</u> | 2012 | Cat   | Urinary tract               | 14 | CC5-II                             | no     | <i>erm(A), aadD</i>                 | <i>sed/seg/sei/sej/sem/sen/seo/ser/seu</i>            | t003 |
| <u>32810</u> | 2012 | Cat   | Urinary tract               | 45 | CC8-IV, Lyon Clone                 | type D | <i>erm(A), aadD</i>                 | <i>sea</i>                                            | t008 |
| <u>32811</u> | 2012 | Cat   | SSTI                        | 57 | CC5-I, Geraldine clone             | type B | <i>aadD</i>                         | <i>sec/sed/seg/sei/sej/sel/sem/sen/seo/ser/seu</i>    | t002 |
| <u>32814</u> | 2012 | Cat   | SSTI                        | 94 | CC8-IV, Lyon Clone                 | type D | <i>erm(A), aadD</i>                 | <i>sea</i>                                            | t008 |
| <u>32820</u> | 2012 | Cat   | Respiratory tract infection | 92 | CC5-IV, Paediatric clone           | no     | none                                | <i>sed/seg/sei/sej/sem/sen/seo/ser/seu</i>            | t777 |
| <u>33648</u> | 2013 | Cat   | Urinary tract               | 62 | CC5-II                             | type B | <i>erm(A), aadD, fosB</i>           | <i>sed/seg/sei/sej/sem/sen/seo/sep(sea) /ser/seu,</i> | t003 |

|              |      |     |                             |    |                             |        |                                                  |                                            |        |
|--------------|------|-----|-----------------------------|----|-----------------------------|--------|--------------------------------------------------|--------------------------------------------|--------|
| 33704        | 2013 | Cat | SSTI                        | 26 | CC398-IV                    | type D | <i>aacA-aphD, tet(M)</i>                         | none                                       | t011   |
| <u>34007</u> | 2013 | Cat | Respiratory tract infection | 92 | CC8-IV, Lyon Clone          | type D | none                                             | <i>sea/sed/sej/ser</i>                     | t008   |
| 35964        | 2014 | Cat | SSTI                        | 92 | <b>CC130-XI</b>             | no     | none                                             | none                                       | t843   |
| 38508        | 2014 | Cat | NP                          | NP | CC398-IV                    | no     | <i>dfrS1, tet(M), fexA</i>                       | none                                       | t2922  |
| 38705        | 2014 | Cat | NP                          | 75 | CC8-IV, Lyon Clone          | type D | <i>erm(A), aadD, fosB, qacA</i>                  | <i>sea</i>                                 | t3291  |
| <u>39614</u> | 2014 | Cat | Urinary tract               | 93 | CC8-IV, Lyon Clone          | type D | <i>erm(A), aadD, fosB</i>                        | <i>sea</i>                                 | t008   |
| <u>39665</u> | 2015 | Cat | NP                          | 59 | CC8-IV, Lyon Clone          | type D | <i>fosB</i>                                      | <i>sea</i>                                 | t008   |
| <u>39667</u> | 2015 | Cat | NP                          | 44 | CC5-IV, Paediatric clone    | type B | <i>aadD, fosB</i>                                | <i>sed/seg/sei/sej/sem/sen/seo/ser/seu</i> | t067   |
| <u>39669</u> | 2014 | Cat | Urinary tract               | 92 | CC8-IV, Lyon Clone          | type D | <i>aadD, cat, fosB</i>                           | <i>sea</i>                                 | t622   |
| 39819        | 2014 | Cat | NP                          | 38 | CC398-IV                    | type B | <i>vga(A), dfrS1, tet(M)</i>                     | none                                       | t15493 |
| <u>26982</u> | 2011 | Dog | SSTI                        | 54 | CC8-IV, Lyon Clone          | type D | <i>erm(C), aadD, fosB</i>                        | <i>sea/sed/sej/ser</i>                     | t008   |
| 27095        | 2011 | Dog | SSTI                        | 94 | CC8-IV, EMRSA-14            | no     | <i>fosB, tetEfflux</i>                           | none                                       | t121   |
| <u>27134</u> | 2011 | Dog | NP                          | 94 | CC8-IV, Lyon Clone          | type D | <i>erm(A), aadD, fosB</i>                        | <i>sea</i>                                 | t008   |
| <u>27139</u> | 2011 | Dog | SSTI                        | 94 | CC8-IV, Lyon Clone          | type D | <i>erm(A), aadD, tet(K), fosB</i>                | <i>sea</i>                                 | t008   |
| 27262        | 2011 | Dog | NP                          | 12 | CC398-IV                    | no     | <i>aadD, dfrA, tet(M), fexA, fosB, tetEfflux</i> | none                                       | t2922  |
| 27267        | 2011 | Dog | NP                          | 94 | Unassigned (CC8)            | type D | <i>erm(A), fosB, tetEfflux</i>                   | <i>sea</i>                                 | t2054  |
| <u>27741</u> | 2011 | Dog | SSTI                        | 94 | CC8-IV, Lyon Clone          | type D | <i>vga(A), fosB</i>                              | <i>sea/sed/sej/ser</i>                     | t211   |
| <u>32078</u> | 2011 | Dog | SSTI                        | 30 | CC8-IV Paediatric clone     | type B | <i>aadD, fosB</i>                                | <i>seg/sei/sem/sen/seo/seu</i>             | t002   |
| <u>32310</u> | 2012 | Dog | NP                          | 6  | CC8-IV, Lyon Clone          | type D | <i>aadD, fosB</i>                                | <i>sea/sed/sej/ser</i>                     | t1343  |
| <u>32313</u> | 2012 | Dog | SSTI                        | 6  | CC8-IV+ccrA4B4, EMRSA-12/13 | type D | <i>fosB</i>                                      | <i>sea/sed/sej/ser</i>                     | t008   |
| 32326        | 2012 | Dog | SSTI                        | 30 | Unassigned (CC30-)          | type D | none                                             | <i>seg/sei/sem/sen/seo/seu</i>             | t012   |
| <u>32643</u> | 2012 | Dog | Respiratory tract infection | 66 | CC8-IV, Paediatric clone    | type B | <i>fusC, fosB</i>                                | <i>seg/sei/sem/sen/seo/seu</i>             | t311   |
| <u>32700</u> | 2011 | Dog | NP                          | 94 | CC8-IV, Lyon Clone          | type D | <i>erm(A), aadD, fosB</i>                        | <i>sea/sed/sej/ser</i>                     | t008   |
| 32706        | 2012 | Dog | NP                          | 75 | CC398-IV                    | no     | <i>aacA-aphD, tet(M)</i>                         | none                                       | t008   |
| 32732        | 2012 | Dog | SSTI                        | 4  | CC398-IV                    | type B | <i>vga(A), tet(M)</i>                            | none                                       | t899   |
| <u>32784</u> | 2012 | Dog | Abdominal surgery           | 75 | CC45-IV, Barnim clone       | type B | <i>erm(C)</i>                                    | <i>sec/seg/sei/sel/sem/sen/seo/seu</i>     | t025   |
| 32978        | 2012 | Dog | Otitis                      | 91 | CC398-IV                    | no     | <i>aacA-aphD, tet(M)</i>                         | none                                       | t011   |
| <u>32983</u> | 2012 | Dog | Respiratory tract infection | 13 | CC59-V                      | type B | <i>msr(A), farI, mupA, qacC</i>                  | <i>seb/sek/seq</i>                         | t316   |
| 33012        | 2012 | Dog | NP                          | 92 | CC398-IV                    | type D | <i>aacA-aphD, tet(M)</i>                         | none                                       | t011   |
| <u>33635</u> | 2013 | Dog | SSTI                        | 57 | CC5-II                      | no     | <i>erm(A), fosB</i>                              | <i>sed/seg/sei/sej/sem/sen/seo/ser/seu</i> | t003   |
| 33658        | 2013 | Dog | NP                          | 94 | CC8-IV, Lyon Clone          | type D | <i>erm(A), aadD, fosB, qacC</i>                  | <i>sea</i>                                 | t460   |
| 33729        | 2013 | Dog | Reproductive tract          | 16 | CC398-IV                    | no     | <i>aadD, dfrS1, tet(M), fexA</i>                 | none                                       | t2922  |
| <u>33875</u> | 2013 | Dog | Bone infection              | 14 | CC5-II                      | type B | <i>erm(A), aadD, fosB</i>                        | <i>seg/sei/sem/sen/seo/seu</i>             | t586   |
| <u>38710</u> | 2014 | Dog | SSTI                        | 42 | CC1-IV/SCCfus               | no     | <i>fusC</i>                                      | <i>seh</i>                                 | t127   |

|              |      |     |                    |    |                       |        |                        |                                                    |        |
|--------------|------|-----|--------------------|----|-----------------------|--------|------------------------|----------------------------------------------------|--------|
| <u>39617</u> | 2014 | Dog | Reproductive tract | 92 | CC8-IV, Lyon Clone    | type D | <i>aadD, fosB</i>      | <i>sea/sed/sej/ser</i>                             | t622   |
| <u>39643</u> | 2014 | Dog | NP                 | 92 | CC8-IV, Lyon Clone    | type D | <i>aadD, cat, fosB</i> | <i>sea/sed/sej/ser</i>                             | t622   |
| <u>39659</u> | 2014 | Dog | Otitis             | 6  | CC22-IV, Barnim clone | type B | none                   | <i>seg/sei/sem/sen/seo/seu</i>                     | t15634 |
| 40091        | 2015 | Dog | SSTI               | 85 | Unassigned (CC5)      | type B | <i>fusC, fosB</i>      | <i>sec/sed/seg/sei/sej/sel/sem/sen/seo/ser/seu</i> | t450   |

<sup>a</sup> underlined are all strains considered as belonging to human-related clones

<sup>b</sup> SSTI: skin and soft tissue infection

<sup>c</sup> In bold and italics are the *mecC*-positive isolates

<sup>d</sup> IEC: Immune Evasion Cluster
